# Supplementary material
Source: PubMed Central journal article supplement (PMC4922890)
Supplement: 10-1055-s-0042-108576-sup_gf1068.pdf [file 10-1055-s-0042-108576-sup_gf1068.pdf]

# Das Deutsche IVF-Register als Instrument zur Dokumentation der assistierten Reproduktionstechnologien

## The German IVF Register as an Instrument to Document Assisted Reproductive Technologies

Autoren

S. Kadi, U. Wiesing

Institut

Institut für Ethik und Geschichte der Medizin, Eberhard Karls Universität Tübingen, Tübingen

### Schlüsselwörter

- assistierte Reproduktion
- Patienteninformation
- Register
- Reproduktionsmedizin

### Key words

- assisted reproductive technology (ART)
- reproductive medicine
- patient information
- register

### Zusammenfassung

Seit 1982 sammelt und publiziert das Deutsche IVF-Register (D.I.R.) Daten zur Anwendung von IVF und angrenzenden Methoden in Deutschland. Als einzige Institution könnte es deutschlandweite Angaben zu den Verfahren und ihren Erfolgsquoten liefern. Aus diesem Grund kommt ihm bei der Information der Öffentlichkeit, der Patienten, politischer Entscheidungsträger und der Scientific Community eine wichtige Rolle zu. Das Register verfügt allerdings weder über die Daten aller in Deutschland behandelnden Zentren noch über vollständige Datensätze aller gemeldeten Behandlungen. Es lässt auch retrospektive Dateneingaben zu, veröffentlicht keine Erfolgsquoten einzelner Zentren und bis 2015 auch keine laienverständliche Zusammenfassung. Das D.I.R. stand in der Vergangenheit bereits in der Kritik. Auch heute kann es die scientific community, die Öffentlichkeit, politische Entscheidungsträger und potenzielle Patientinnen nur unzureichend über die Ergebnisse der assistierten Reproduktion informieren. Die Dokumentation von reproduktionsmedizinischen Interventionen ist in anderen Ländern deutlich aussagekräftiger.

### Abstract

The German IVF Register (Deutsches IVF-Register [D.I.R.]) has been collecting and publishing data on the use of IVF and related methods in Germany since 1982. It is the only institution which provides information for all of Germany on procedures and their success rates. For this reason it plays an important role in the provision of information to the public, to patients, political decision-makers and the scientific community. However, the register does not have the data of all centers offering treatment in Germany nor does it have complete datasets on all reported treatments. The register accepts retrospective data entries, it does not publish the success rates of individual centers and up until 2015 it did not provide a summary of information which was suitable for non-specialists. The D.I.R. has been the focus of criticism in the past. Even today, the information it provides to the scientific community, the public, political decision-makers and potential patients on the outcomes of assisted reproduction is insufficient. The documentation of reproductive medicine procedures in other countries is much more meaningful.

eingereicht 17.2.2016

revidiert 3.5.2016

akzeptiert 12.5.2016

### Bibliografie

**DOI** <http://dx.doi.org/10.1055/s-0042-108576>  
 Geburtsh Frauenheilk 2016; 76:  
 1–5 © Georg Thieme Verlag KG  
 Stuttgart · New York ·  
 ISSN 0016-5751

### Korrespondenzadresse

**Dr. Selma Kadi**  
 Institut für Ethik und Geschichte  
 der Medizin  
 Eberhard Karls Universität  
 Tübingen  
 Gartenstraße 47  
 72074 Tübingen  
[selma.kadi@uni-tuebingen.de](mailto:selma.kadi@uni-tuebingen.de)

### Einleitung

Eine Medizin mit wissenschaftlichem Anspruch unterliegt nicht nur der Vorgabe, kranken Menschen zu helfen, sondern auch der Verpflichtung, sich selbst und der Öffentlichkeit über den Erfolg ihrer Bemühungen Rechenschaft zu geben. Es reicht nicht, nur helfen zu wollen, sondern die Resultate ärztlicher Handlungen müssen zudem gesammelt, aufgearbeitet, dokumentiert und kritisch bewertet werden. Eine Medizin mit wissenschaftlichem Anspruch muss klären, ob und in welchem Ausmaß Ärzte die angestrebte Hilfe für

ihre Patienten auch tatsächlich leisten. Dies gilt auch für reproduktionsmedizinische Verfahren. Das Deutsche IVF Register (D.I.R.) dokumentiert seit 1982, also kurz nach den ersten erfolgreichen IVF-Behandlungen in Deutschland, die Anwendung von IVF und angrenzenden Methoden, wertet die Ergebnisse aus und veröffentlicht sie in Form von Jahresberichten. Keine andere Institution könnte deutschlandweite Angaben zu den Verfahren und ihren Erfolgsquoten machen. Der vorliegende Beitrag untersucht die institutionelle Verankerung des D.I.R. sowie dessen Dokumentation der IVF und angrenzender Methoden.

## Das D.I.R als Institution

Das D.I.R wurde 1982 als freiwilliger Zusammenschluss von IVF-Zentren gegründet [1] und 1996 als Einrichtung der Deutschen Gesellschaft für Gynäkologie und Geburtshilfe anerkannt [2]. Von der Einrichtung der Bundesgeschäftsstelle 1996 bis 2013 betreute die Landesärztekammer Schleswig-Holstein das Register [3,4]. 1998 forderte erstmals eine Richtlinie der Bundesärztekammer zur Durchführung der assistierten Reproduktion, dass die Ärztekammern gemeinsam ein Dokumentationszentrum genannt „Deutsches IVF-Register = D.I.R“ einrichten sollten [5] (S. 3169). Ausnahmslos alle Zentren sollten Daten liefern: „Jede Arbeitsgruppe hat eine EDV-gestützte Dokumentation entsprechend dem Fragenkatalog des Deutschen IVF-Registers zu erstellen“ [5] (S. 3169). Tatsächlich meldeten jedoch nicht alle Zentren an das D.I.R [6]. Der damalige Vorstandsvorsitzende des D.I.R forderte in einer nichtöffentlichen Anhörung der Enquete-Kommission „Recht und Ethik der modernen Medizin“ des Bundestags am 26. März 2001 „zur Vermeidung von Wildwuchs“ ein „Bundesamt für Fortpflanzungsmedizin“ nach britischem Vorbild, dem unter anderem die Lizenzierung von Zentren, die Dokumentation der Ergebnisse und die unangemeldete, regelmäßige Kontrolle der Zentren obliegen müsse“ [6] (S. 54). Dies wurde jedoch nicht eingeführt.

2009 wandelte sich das D.I.R in einen eingetragenen Verein (e.V.) mit Sitz in Berlin. Ein solcher Verein kann von Haus aus keine Zwangsmitgliedschaft von allen reproduktionsmedizinischen Zentren erwirken. Ab 2013 arbeitete die Landesärztekammer Schleswig-Holstein nicht mehr mit dem D.I.R zusammen [4]. 2014 wurde die (Muster-)Richtlinie abgeändert, sodass fortan keine Datensammlung über das D.I.R mehr empfohlen wird, sondern die jeweilige Landesärztekammer selbst bestimmen soll, wo die Daten gesammelt werden [7]. Damit hat das D.I.R seinen Status als nationale Datenannahmestelle verloren. Es bleibt allerdings weiterhin das einzige deutschlandweite Register.

Aktuell gibt es keine Verpflichtung für alle reproduktionsmedizinischen Zentren in Deutschland, Daten an das D.I.R weiterzuleiten [8]. Zudem liefern auch jene Zentren, die offiziell Mitglieder des D.I.R sind, keineswegs immer vollständige Daten über den Behandlungs- bzw. Schwangerschaftsverlauf. Obwohl das D.I.R mittlerweile die Daten eines Jahres erst im September des darauffolgenden Jahres erhebt, weisen diese beträchtliche Lücken auf. Auch das nächste Jahrbuch füllt diese Lücken nicht. Das D.I.R zeigte in einer 2014 publizierten Sonderauswertung, dass auch von den Schwangerschaften des Jahres 2012 im Schnitt lediglich 84,9% der Schwangerschaftsausgänge je Zentrum gemeldet waren [9].

Die Bestimmungen der (Muster-)Richtlinie zur Durchführung der assistierten Reproduktion der Bundesärztekammer (Bundesärztekammer 2006) spezifizieren auch die Art der Dokumentation. Demnach sollen die Daten ausschließlich prospektiv erfasst werden. Das D.I.R hatte dies bereits 1997 beschlossen [1]. Die Prospektivität ist so definiert, dass Angaben zum Behandlungszyklus innerhalb von 8 Tagen nach Beginn der hormonellen Behandlung dokumentiert werden müssen. Insofern ist keine Prospektivität im strengen Sinne verlangt. Zudem ist nicht auszuschließen, dass sämtliche Daten zeitversetzt eingegeben werden. Folgende Daten sollen gemeldet werden:

„homologe Insemination nach hormoneller Stimulation, IVF mit ET, GIFT, ICSI, heterologe Insemination nach hormoneller Stimulation, heterologe IVF/ICSI, PKD bezüglich:

Alter der Patientin, Indikation der Methoden, Verlauf der Stimulation, Anzahl und Befruchtungsrate der inseminierten Eizellen bei IVF/ICSI, Anzahl der transferierten Eizellen bei GIFT, Anzahl der transferierten Embryonen bei IVF/ICSI, Schwangerschaftsrate, Geburtenrate, Fehlgeburten, Eileiterschwangerschaften, Schwangerschaftsabbrüche, Mehrlingsrate, Fehlbildungen“ [10] (S. 1398).

Die Forderung nach prospektiver Dateneingabe ist gut begründet, denn die Versuchung zur Manipulation bei retrospektiver Datenerhebung ist wohl bekannt. So verweisen Stammer et al. 2004 auf einen Unterschied in den Schwangerschaftsraten bei IVF für das Jahr 1997 zwischen gemischten (24,4%) und ausschließlich prospektiven Daten (18,5%) [11]. Trotz der bekannten Verzerrungen beruht die Berechnung der Baby-take-Home-Rate (BTHR) für 2012 auch im Jahrbuch 2013 auf prospektiven und retrospektiven Daten [9] (S. 14).

## Die Definition von „Erfolg“ durch ein nationales Register

Das D.I.R publiziert nicht nur Ergebnisse, sondern setzt auch Standards. Als einziges deutschlandweites Register ist es auch daran beteiligt zu definieren, was als Erfolg der Reproduktionsmedizin gilt. Ist die Qualität der gebotenen Dienstleistung im Sinne einer Unterstützung der Eltern beim Umgang mit einer Störung [12], die Geburt eines Kindes oder das Eintreten einer Schwangerschaft ausschlaggebend? Für die Patienten ist letzteres auf keinen Fall entscheidend. Abhängig davon, welche Kriterien gewählt werden, erscheint die Reproduktionsmedizin jedoch mehr oder weniger erfolgreich.

Quoten für klinische Schwangerschaften pro Embryotransfer, wie sie IVF-Zentren auch auf ihren Webseiten gerne angeben [13], sind naturgemäß um einiges höher als jene für Lebendgeburten. Für Patienten sind jedoch die Lebendgeburtenraten wichtig. Auch Lebendgeburtenraten können unterschiedlich berechnet werden [14], beispielsweise als Anteil der Geburten an allen begonnenen Behandlungen oder an allen durchgeführten Embryotransfers. Werden lediglich die Embryotransfers berücksichtigt (Lebendgeburten dividiert durch Embryonentransfers), fehlen in der Berechnung alle Behandlungen, bei denen es gar nicht zum Transfer gekommen ist (dies entspricht der Berechnung im letzten Bericht des D.I.R [9]).

Eine weitere Möglichkeit, den Erfolg zu quantifizieren, sind kumulative Lebendgeburtenraten. Diese drücken den kumulativen Erfolg bei der jeweiligen Zahl der durchgeführten Zyklen aus. Diese Zahl ist allerdings abhängig von der Bereitschaft (und der Möglichkeit), die jeweilige Anzahl an Behandlungsversuchen durchzuführen. Wird eine kumulative Lebendgeburtenrate angegeben, ist deshalb die Information über den Anteil derjenigen Paare unverzichtbar, die die Behandlung früher abgebrochen haben. Die Auswertung des D.I.R beinhaltet keine kumulative Lebendgeburtenrate, aber Angaben über die Anzahl der Behandlungen pro Frau 1997–2013 [9] (S. 29): Demnach haben über 40% der Frauen lediglich eine Behandlung in Anspruch genommen. 15% unterzogen sich 3 Behandlungen, weniger als 9% 4 Behandlungen, weniger als 5% 5 Behandlungen, weniger als 1% 10 Behandlungen.

## Das D.I.R als Informationsquelle für Patienten

Nur das D.I.R wäre in der Lage, jährlich deutschlandweite Daten zur assistierten Reproduktion zu veröffentlichen. Damit könnte ihm eine bedeutende Rolle für die Information von Patienten zukommen. Allerdings müssten die Informationen so aufbereitet werden, dass sie für Patienten verständlich und relevant sind. Beides ist nicht gewährleistet. Im Jahr 2015 wurde erstmals eine viel zu kurze und zudem unkritische Zusammenfassung angefügt [15]. Obwohl das D.I.R über die Ergebnisse der einzelnen Zentren verfügt, veröffentlicht es lediglich bundesweite Daten, die, wie bereits erwähnt, auch noch unvollständig und zum Teil retrospektiv eingegeben sind. Es gibt keine Auskunft über die Erfolge einzelner Zentren. Nach aktueller Satzung des D.I.R ist die „Weitergabe oder die Veröffentlichung von Daten, aus denen sich die Identität eines Zentrums ableiten lässt, [...] unzulässig“ [16] (S. 5). Die Veröffentlichung eines nationalen Standards wurde bereits vor Jahren von deutschen Reproduktionsmedizinern gefordert [17], um Patienten bei der Auswahl eines Zentrums zu unterstützen. Auch international ist dies durchaus üblich. So veröffentlicht beispielsweise in Großbritannien jene Behörde, die auch das offizielle Register verwaltet, Informationen zu den Ergebnissen der einzelnen Zentren [18]. Die Patienten können für jedes Zentrum die Wahrscheinlichkeit einer Lebendgeburt bei einer bestimmten Methode in mehreren Altersklassen und im Vergleich zum entsprechenden nationalen Durchschnitt einsehen. Die Publikationen des D.I.R geben diese Auskünfte nicht.

## Die Ergebnisse der assistierten Reproduktionstechnologien in Deutschland

Das Jahrbuch ordnet die Baby-take-Home-Raten nach Methoden, nämlich 17,78% bei IVF, 18,02% bei ICSI, 22,09% bei IVF/ICSI-Kombination und 12,58% bei Kryotransfers für das Jahr 2012 [9] (S. 14, Lebendgeburten dividiert durch Behandlungen). Die mittlere Baby-take-Home-Rate aller Methoden beträgt daher 17,62%. Allerdings gilt es dabei Folgendes zu bedenken:

1. Trotz einer „integrierte[n] Prospektivitätsprüfung“, die auch als „Alleinstellungsmerkmal des Deutschen IVF-Registers“ [1] gepriesen wird, basiert die Berechnung auf prospektiven und retrospektiven Daten. Dies entspricht nicht dem Beschluss des D.I.R von 1997 und der seit 2006 von der Bundesärztekammer empfohlenen Anforderung, derzufolge die Behandlungszyklen prospektiv (definiert als spätestens 8 Tage nach Beginn der hormonellen Behandlung) dokumentiert werden sollen.
2. Von 81 035 gemeldeten bzw. 77 368 plausiblen Behandlungen sind auch 2014 2116 Ausgänge (2,73% der plausiblen Behandlungen) unbekannt, obwohl die Behandlung 2012 begonnen wurde, daher das Ergebnis am 18.09.2014 feststehen muss [9] (S. 13). Der Anteil der 2014 nicht erfassten Schwangerschaftsausgänge je Methode liegt zwischen 11 (IVF/ICSI) und 17 (IVF) Prozent der Schwangerschaften.

Das D.I.R gibt zudem 2 weitere, höhere Baby-take-Home-Raten an [9] (S. 14). Bei der einen Version (A) werden die Zyklen ohne bekannten Schwangerschaftsausgang nicht mit einberechnet. In diesem Fall liegt die mittlere Baby-take-Home-Rate aller Behandlungsmethoden bei 18,33%. Im anderen Fall (B) wird eine „wahrscheinliche Geburtenrate“ [9] (S. 14) (Geburten pro Schwangerschaft) für die Zyklen mit unbekanntem Ausgang angenommen und zu den bekannten Geburten addiert. Die mittlere Baby-take-Home-Rate aller Behandlungsmethoden

beträgt dann 20,14%. Beide Versionen dürften aber unter der begründeten Annahme, dass erfolglose Behandlungsausgänge weniger häufig gemeldet werden, zu hohe Ergebnisse präsentieren.

3. Die angegebenen Baby-take-Home-Raten beziehen sich nicht auf die begonnenen Behandlungszyklen ab Medikamentenabgabe, sondern beginnen mit späteren Schritten. Demnach bleiben Behandlungen unberücksichtigt, die bei vorhergehenden Schritten (Stimulation zur Eizellenentnahme, Follikelpunktion, Gewinnung von Eizellen, Durchführung der Eizellbehandlung bzw. Vorbehandlung zum Kryotransfer) erfolglos waren oder abgebrochen wurden [9] (S. 13). Was bedeutet das? Die mittlere Baby-take-Home-Rate für alle Behandlungsmethoden beträgt laut D.I.R 17,62% (Mittelwert der niedrigsten angegebenen Baby-take-Home-Rate aller Methoden, Lebendgeburten pro IVF, ICSI, IVF/ICSI) [9]. Wird diese mittlere Baby-take-Home-Rate jedoch schon ab der Stimulation zur Eizellenentnahme bzw. der Vorbehandlung zum Kryotransfer berechnet (und nicht erst ab Transfer), ergibt sich für 2012 eine Rate von 15,27% (Geburten dividiert durch plausible Zyklen). Zudem ist die Verzerrung durch retrospektive Dateneingabe zu berücksichtigen.

Insofern suggeriert die vom D.I.R gewählte Art der Berechnung der Baby-take-Home-Rate unrealistisch hohe Erfolge. Dies unterwandert das informierte Einverständnis. Die Patienten neigen ohnehin dazu, die Chancen der IVF und angrenzender Methoden zu überschätzen [19,20]. Die Publikationen des D.I.Rs verstärken diese Tendenz. Zudem muss man feststellen, dass die Erfolgsquote von 15%, von der die Bundesärztekammer bereits 1988 behauptete, sie bedürfe „dringend der Verbesserung“ [21] (S. 36), auch 27 Jahre später bestenfalls knapp erreicht wird.

## Schlussfolgerung

Das D.I.R ist das einzige Register, das bestrebt ist, deutschlandweit Daten zu den Ergebnissen von IVF und angrenzenden Methoden zu sammeln und zu veröffentlichen. Diese Daten sind für die wissenschaftliche Bewertung der Maßnahmen, für politische Entscheidungen in der Reproduktionsmedizin, für die Öffentlichkeit und die Patienten unverzichtbar. Ohne Wissen über die tatsächlichen Chancen, Risiken und Belastungen können sich Patienten nicht informiert für oder gegen Behandlungen entscheiden.

Die Erfolgsquoten der IVF und angrenzender Methoden waren von Anfang an gering. Die Versuchung, sie zu schönen, war dementsprechend groß. Schon 1985 forderte Soules in Bezug auf die „In Vitro Fertilization Pregnancy Rate: Let's be Honest with One Another“ [22]. Um aussagekräftige Daten über den Einsatz assistierter Reproduktionstechnologien in Deutschland zu erhalten, ist es notwendig, wie von der Bundesärztekammer 2006 vorgeschlagen, prospektive Daten über den Gesamtverlauf aller Behandlungszyklen zu sammeln [10]. Nur so lassen sich verlässliche nationale Ergebnisse für einzelne Methoden und Altersgruppen berechnen. Dass nicht alle Zentren am D.I.R teilnehmen, darf man durchaus als „Skandal“ bezeichnen [23] (S. 52). Trotz der wichtigen Funktionen, die das D.I.R erfüllen könnte, ist sein Status unsicher. Ursprünglich entwickelte es sich aus einem freiwilligen Zusammenschluss von IVF-Zentren. Nach einer Zeit der Anerkennung durch die Aufnahme in die Richtlinien der Bundesärztekammer fehlt ihm heute diese Anerkennung.

Die Daten im D.I.R sind in mehrfacher Hinsicht mangelhaft: Erstens werden lediglich die Daten einer Auswahl aller in Deutschland ansässigen Zentren dokumentiert. Zweitens werden auch von den dokumentierten Behandlungszyklen keineswegs immer alle Daten inklusive Geburten an das D.I.R gemeldet. Drittens verwendet das D.I.R nach wie vor prospektive und retrospektive Daten, obwohl Richtlinien und eigene Beschlüsse das verhindern sollen. Retrospektiv gemeldete Daten sind leichter manipulierbar und produzieren bewiesenermaßen unrealistisch hohe Ergebnisse. Viertens publiziert das D.I.R keine Ergebnisse einzelner Zentren. Insofern können sich Patientinnen nicht wie beispielsweise in Großbritannien informieren, wo auf einer Webseite der nationalen Behörde HFEA [18] Erfolgsquoten einzelner Zentren abrufbar sind. Fünftens: Die Darstellung ist für Laien durchweg ungeeignet, da zu kompliziert. Die 2015 erstmals veröffentlichte Zusammenfassung für Patienten ist zu kurz und zudem unkritisch. Eine Auskunft über die Ergebnisse einzelner Zentren gibt auch sie nicht.

Die Daten des D.I.R erwirken unrealistische Vorstellungen von den Erfolgen, indem sie vor allem Erfolgsquoten von Teilschritten angeben. Die Baby-take-Home-Rate ab Stimulation ist naturgemäß geringer als die Erfolge der Teilschritte. Doch nur die niedrigste Zahl ist relevant für die Frau oder das Paar. Teilschritte sind zwar für die Wissenschaft von Bedeutung, eignen sich jedoch nicht als Maß, um Patienten über den zu erwartenden Erfolg zu informieren. Insofern stellt sich die Präsentation der Ergebnisse wie folgt dar: Nicht nur die Qualität der publizierten Zahlen ist unzureichend. Selbst wenn sie nur kontrolliert prospektiv eingegeben würden und vollständig wären, würden sie einen Erfolg der Wissenschaft repräsentieren, aber nicht unbedingt einen Nutzen für die Patientinnen. Die Wissenschaft macht sich auf diese Weise selbst und nicht die Patientin zum Referenzpunkt für den Erfolg [24]. Damit entfremdet sich die Medizin jedoch von ihrer genuinen Aufgabe. Die effektive Erfolgsquote von etwa 15% pro Behandlung in Deutschland ist zudem ernüchternd angesichts der Zahlen, mit denen für IVF geworben wird (siehe [13]).

Die Dokumentation und Kommunikation der Ergebnisse von IVF und angrenzenden reproduktionsmedizinischen Therapien ist seit Anbeginn kritisiert worden (siehe [25,26]). Nicht zuletzt bemerkte die Enquete-Kommission des Bundestags 2002, dass nicht alle Zentren in Deutschland ihre Daten an das D.I.R übermitteln [6]. Dieser Mangel wirkt sich auch auf politische Entscheidungen aus, die nicht auf qualitativ hochwertige Daten zurückgreifen können. Das D.I.R hat seit dem Bericht der Enquete-Kommission „Recht und Ethik in der modernen Medizin“ 14 Jahre Zeit gehabt, Daten in akzeptabler Qualität zu liefern. Das ist bisher nicht geschehen.

Bereits seit Jahren wird für Deutschland eine eigene Behörde – ähnlich der britischen HFEA – gefordert, die dann auch eine Kontrollfunktion besitzen müsste (z. B. [27]). Aktuell erarbeiten Gremien der Landesärztekammern neue Prozesse für das Qualitätsmanagement [9]. Denn „[d]ie Ärztekammern haben sich entschlossen, das für die reproduktionsmedizinischen Zentren bereits bestehende Verfahren der Qualitätssicherung zugunsten einer bundesweit abgestimmten, länderübergreifenden Förderung der Qualität in der Reproduktionsmedizin weiterzuentwickeln und deutlicher als bisher von wissenschaftlichen Fragestellungen und der Registerfunktion zu trennen“ [28] (2. Absatz). Es ist allerdings zweifelhaft, ob die neuen Formen des Qualitätsmanagements die bekannten Mängel des D.I.R beheben werden. Für eine aufgeklärte Gesellschaft ist es inakzeptabel, sich in

einer so wichtigen modernen Technologie keine angemessene Auskunft geben zu können. Wenn es der Selbstverwaltung der Ärzteschaft nicht gelingt, diese Informationen bereitzustellen, dann lässt sich eine staatliche Behörde oder ein Institut unter staatlicher Aufsicht nicht vermeiden.

Die Forderung nach besserer Dokumentation der Erfolgsquoten ist keineswegs unrealistisch, sondern in anderen Ländern realisiert worden [29]. Insofern gibt es keine überzeugenden Argumente, warum nicht auch in Deutschland eine qualitativ hochwertige, umfassende und auch für Laien aufgearbeitete Dokumentation möglich sein sollte.

## Danksagung

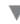

Die Autoren danken einem der anonymen Gutachter für den Hinweis auf eine Manipulationsmöglichkeit bei der Datenübermittlung an das D.I.R, die ihnen unbekannt war. Sie sind überdies Frau Prof. Dr. Dorothee Kimmich, Germanistisches Seminar der Universität Tübingen, zu Dank verpflichtet.

## Interessenkonflikt

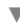

Die Autoren erklären, dass kein Interessenkonflikt besteht.

## Literatur

- 1 D.I.R. Geschichte des Deutschen IVF-Registers. 2016. Online: <http://www.deutsches-ivf-register.de/geschichte.php>; Stand: 28.01.2016
- 2 Kupka MS, van Rooij TNM, Happel L. Informationstechnologie als Werkzeug der Datengenerierung und Kommunikation im Deutschen IVF-Register – Das Deutsche IVF-Register 1996–2006. In: Felberbaum R, Bühler J, van der Ven H, Hrsg. Das Deutsche IVF-Register 1886–2006. 10 Jahre Reproduktionsmedizin in Deutschland. Heidelberg: Springer Medizin; 2007
- 3 Felberbaum R, Bühler K, van der Ven H. Das Deutsche IVF-Register 1996–2006. 10 Jahre Reproduktionsmedizin in Deutschland In: Felberbaum R, Bühler K, van der Ven H, Hrsg. Das Deutsche IVF-Register 1996–2006, 10 Jahre Reproduktionsmedizin in Deutschland. Heidelberg: Springer Medizin; 2007
- 4 D.I.R. Jahrbuch 2012 Deutsches IVF-Register. 2013. Online: <http://www.deutsches-ivf-register.de/perch/resources/downloads/dirjahrbuch2012-d.pdf>; Stand: 27.08.2015
- 5 Bundesärztekammer. Richtlinien zur Durchführung der assistierten Reproduktion. Dtsch Ärztebl 1998; 95: 3166–3171
- 6 Enquete-Kommission Recht und Ethik der modernen Medizin. Schlussbericht. 2002: 1–280. Online: <http://dip21.bundestag.de/dip21/btd/14/090/1409020.pdf>; Stand: 28.01.2016
- 7 Bundesärztekammer. (Muster)Richtlinie zur Durchführung der assistierten Reproduktion. Dtsch Ärztebl 2014; 111: 554
- 8 EIM Consortium. ESHRE's data collection: developments in online submission and in achieving greater coverage. Focus on Reproduction 2015; 9: 10–11
- 9 D.I.R. Jahrbuch 2013 Deutsches IVF Register. 2014. Online: <http://www.deutsches-ivf-register.de/perch/resources/downloads/141117dir-jb-2013-deweb2.pdf>; Stand 27.08.2015
- 10 Bundesärztekammer. (Muster)Richtlinie zur Durchführung der assistierten Reproduktion Novelle 2006. Dtsch Ärztebl 2006; 103: 1392–1403
- 11 Stamm H, Verres R, Wischmann T. Paarberatung und -therapie bei unerfülltem Kinderwunsch. Göttingen: Hogrefe Verlag; 2004
- 12 Alper M, Brinsden P, Fischer R et al. Is your IVF programme good? Hum Reprod 2002; 17: 8–10
- 13 Kadi S, Wiesing U. Entscheidung ohne Information? Die Darstellung von Erfolg und Misserfolg der IVF und angrenzender Methoden auf den Webseiten deutscher IVF-Zentren. Geburtsh Frauenheilk 2015; 75: 1258–1263
- 14 Sharif K, Afnan M. The IVF league tables: time for a reality check. Hum Reprod 2003; 18: 483–485

- 15 *D.I.R.* Jahrbuch 2014 Deutsches IVF Register. 2015. Online: <http://www.deutsches-ivf-register.de/perch/resources/downloads/dir-2014-d-1.pdf>; Stand: 17.02.2016
- 16 *D.I.R.* Satzung des Deutschen IVF-Registers e.V. (D.I.R) (unkonsolidiert) 15. November 2008 geändert am 2. Dezember 2013 zuletzt geändert (§ 12.2) am 4.12.2015 2015. Online: <http://www.deutsches-ivf-register.de/perch/resources/downloads/satzung.pdf>; Stand: 28.01.2016
- 17 *Felberbaum R, Dahnke W.* Das Deutsche IVF-Register als Instrument der Qualitätssicherung und zur Beratung der Patienten. *Gynäkologe* 2000; 33: 800–811
- 18 *HFEA.* Choose a fertility clinic. 2015. Online: <http://guide.hfea.gov.uk/guide/>; Stand: 07.09.2015
- 19 *Kentenich H, Tandler-Schneider A.* Die Arztrolle in unterschiedlichen klinischen Kontexten: Ärztliche Beratung bei In-vitro-Fertilisation (IVF) und Präimplantationsdiagnostik (PID). *Bundesgesundheitsblatt* 2012; 55: 1144–1153
- 20 *Revermann C, Hüsing B.* Fortpflanzungsmedizin – Rahmenbedingungen, wissenschaftlich-technische Entwicklungen und Folgen: Endbericht zum TA-Projekt. Berlin: TAB; 2010
- 21 *Bundesärztekammer.* Weissbuch Anfang und Ende menschlichen Lebens. Köln: Deutscher Ärzte-Verlag; 1988
- 22 *Soules MR.* The in vitro fertilization pregnancy rate: let's be honest with one another. *Fertil Steril* 1985; 43: 511–513
- 23 *Rjosk HK, Haeske-Seeberg H, Seeberg B et al.* IVF und GIFT – Ergebnisse in Deutschland 1993. *Fertilität* 1995; 11: 48–54
- 24 *Wiesing U.* Medicine and Hubris – The Case of reproductive Medicine. In: Deltas C, Kalokairinou EM, Rogge S, eds. *Progress in Science and the Danger of Hubris*. Münster, New York, München, Berlin: Waxmann; 2006: 127–136
- 25 *Wiesing U.* Ethik, Erfolg und Ehrlichkeit. Zur Problematik der In-vitro-Fertilisation. *Ethik Med* 1989; 1: 66–82
- 26 *Hölzle C, Wiesing U.* Die In-vitro-Fertilisation – ein umstrittenes Experiment. Fakten – Leiden – Diagnosen – Ethik. Berlin: Springer; 1991
- 27 *Diedrich K, Felberbaum R, Griesinger G et al.* Reproduktionsmedizin im internationalen Vergleich. Wissenschaftlicher Sachstand, medizinische Versorgung und gesetzlicher Regelungsbedarf. Berlin: Friedrich Ebert Stiftung; 2008
- 28 *Frühauf N, Bogs K.* QS REPROD – Das neue Qualitätssicherungsverfahren in der Reproduktionsmedizin. *niedersächsisches ARZTEblatt* 2014. Online: [http://www.haeverlag.de/nae/n\\_beitrag.php?id=4492](http://www.haeverlag.de/nae/n_beitrag.php?id=4492); Stand: 28.01.2016
- 29 *Simoes S, Bauer F, Schmahl FW.* Register als Methode der Qualitätsförderung. *Gesundheitswesen* 2003; 65: 516–525
